# Supplementary material for: Development of Primary Monolayer Cell Model and Organotypic Model of Uterine Leiomyoma
Source: Methods Protoc. 2022 Feb 6;5(1):16. doi: 10.3390/mps5010016 (PMC8875914; doi:10.3390/mps5010016)
Supplement: Supplementary file 1 [file mps-05-00016-s001.zip › mps-1471064-supplementary.pdf]

# **Development of primary monolayer cell model and organotypic model of uterine leiomyoma**

**Natalia Shved<sup>1</sup>, Anna Egorova<sup>1</sup>, Natalia Osinovskaya<sup>1</sup> and Anton Kiselev<sup>1,\*</sup>**

<sup>1</sup> Department of Genomic Medicine, D.O. Ott Research Institute of Obstetrics, Gynecology and Reproductology, Mendeleevskaya line 3, 199034 Saint-Petersburg, Russia; [natashved@mail.ru](mailto:natashved@mail.ru) (N.S.), [egorova\\_anna@yahoo.com](mailto:egorova_anna@yahoo.com) (A.E.), [natosinovskaya@mail.ru](mailto:natosinovskaya@mail.ru) (N.O.)

\* Correspondence: [ankiselev@yahoo.co.uk](mailto:ankiselev@yahoo.co.uk); Tel.: +7-812-328-9809 (A.V.)

**Contents**

**Figure S1.** Detection of heterozygous mutation c.131G>A in MED12 gene in the same primary UL cell line at passages p0 and p1 cultured with AmnioMAX™ C-100 or DMEM F-12 medium.....3

**Figure S2.** Histological characterization of the organotypic model. Hematoxyline-eosine stained cryosections of UL fragments after 7, 14 and 21days of culture (magnification ×200).....4

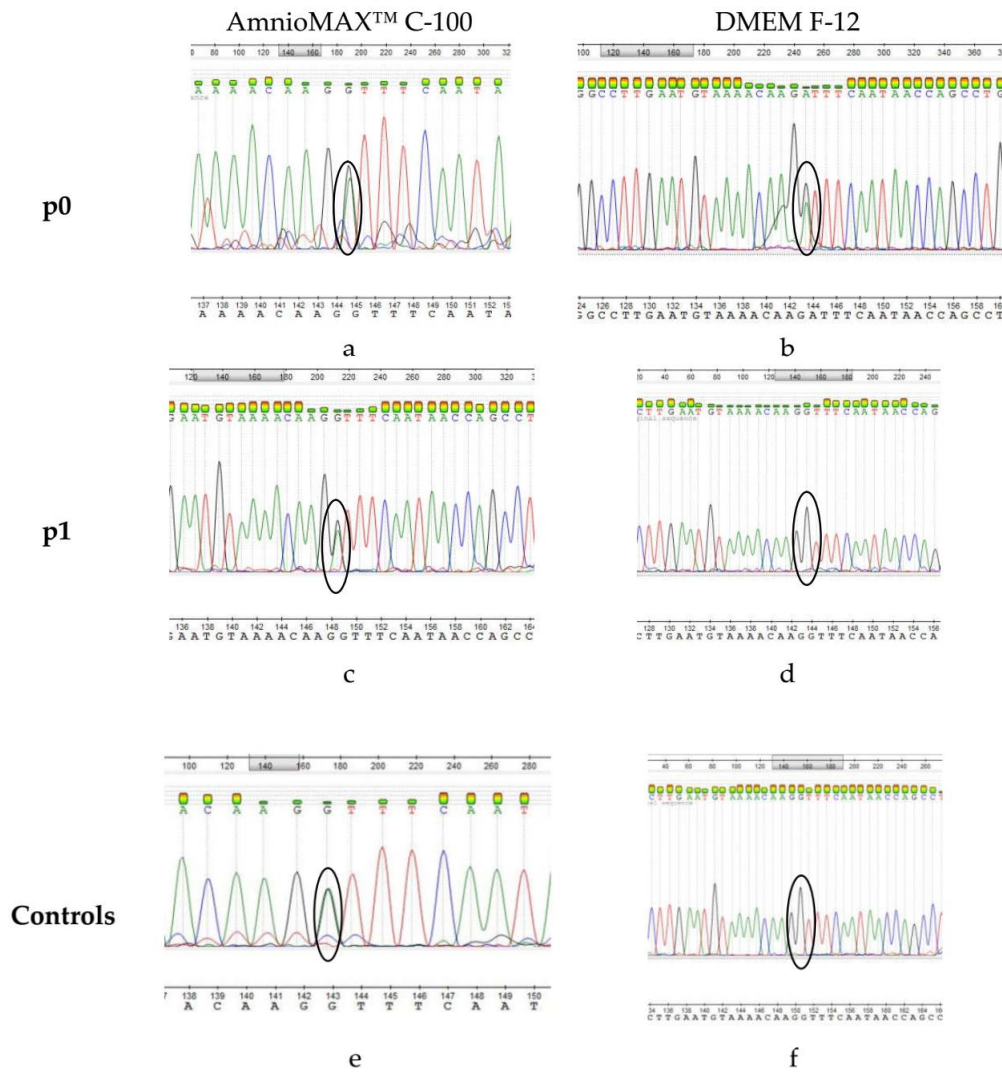

**Figure S1.** Detection of heterozygous mutation c.131G>A in *MED12* gene in the same primary UL cell line at passages p0 (**a**, **b**) and p1(**c**, **d**) cultured with AmnioMAX™ C-100 (**a**, **c**) or DMEM F-12 medium (**b**, **d**); controls – native myomatous node (**e**) and surrounding myometrium (**f**).

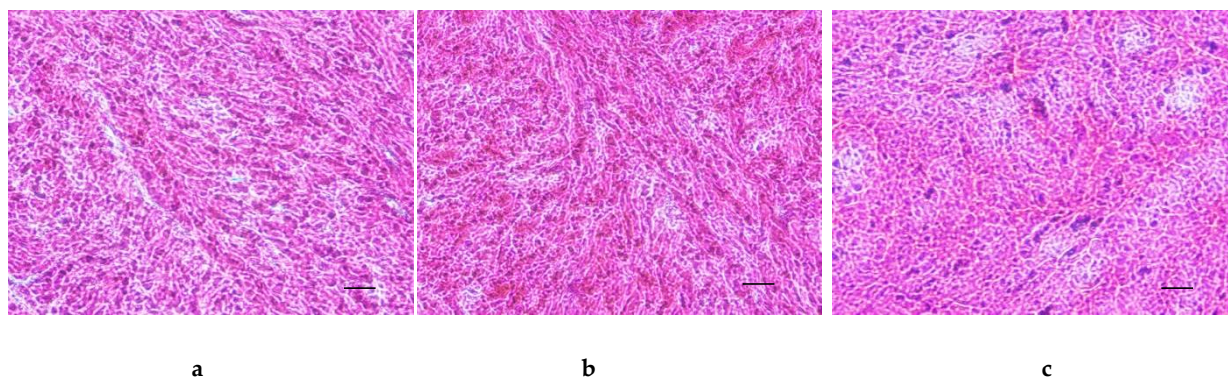

**Figure S2.** Histological characterization of the organotypic model. Hematoxyline-eosine stained cryosections of UL fragments after 7 (**a**), 14 (**b**) and 21(**c**) days of culture (magnification  $\times 200$ ; scale bar is 100  $\mu\text{m}$ ).
